# Supplementary material for: Electrochemical reduction of Ag2VP2O8composite electrodes visualized via in situ energy dispersive X-ray diffraction (EDXRD): unexpected conductive additive effects
Source: Royal Society of Chemistry journal article supplement (doi:10.1039/c5ta04523a), 2015-01-01
Supplement: c5ta04523a1.pdf [file c5ta04523a1.pdf]

## Supplementary Information:

### Electrochemical reduction of $\text{Ag}_2\text{VP}_2\text{O}_8$ composite electrodes visualized via *in situ* Energy Dispersive X-Ray Diffraction (EDXRD): unexpected conductive additive effects

Kevin C. Kirshenbaum<sup>a</sup>, David C. Bock<sup>b</sup>, Zhong Zhong<sup>a</sup>, Amy C. Marschilok<sup>b,c\*</sup>, Kenneth J. Takeuchi<sup>b,c\*</sup>, Esther S. Takeuchi<sup>a,b,c\*</sup>

<sup>a</sup> Energy Sciences Directorate, Brookhaven National Laboratory, Upton, NY 11973, USA

<sup>b</sup> Department of Chemistry, Stony Brook University, Stony Brook, NY 11794, USA

<sup>c</sup> Department of Materials Science and Engineering, Stony Brook University, Stony Brook, NY 11794, USA

\*Corresponding authors: (A.C.M.) [amy.marschilok@stonybrook.edu](mailto:amy.marschilok@stonybrook.edu);  
(K.J.T.) [kenneth.takeuchi.1@stonybrook.edu](mailto:kenneth.takeuchi.1@stonybrook.edu), (E.S.T.) [esther.takeuchi@stonybrook.edu](mailto:esther.takeuchi@stonybrook.edu)

| DOD, Rate   | 0            | 0.1, C/1440  | 0.5, C/1440  | 0.1, C/168   | 0.5, C/168   | 1.0, C/168   |
|-------------|--------------|--------------|--------------|--------------|--------------|--------------|
| $\chi^2$    | 0.000254     | 0.000155     | 0.000145     | 0.000356     | 0.00037      | 0.000404     |
| $R_s$       | 2.15(1)      | 2.77(1)      | 1.90(1)      | 3.87(2)      | 2.24(2)      | 1.64(1)      |
| $C_{dl1,T}$ | 0.000178(12) | 0.000192(13) | 0.000187(13) | 0.000216(37) | 0.000260(34) | 0.000252(27) |
| $C_{dl1,P}$ | 0.752(7)     | 0.768(71)    | 0.770(8)     | 0.765(18)    | 0.762(15)    | 0.726(12)    |
| $R_m$       | 4.21(5)      | 3.16(4)      | 2.51(5)      | 2.04(5)      | 2.05(8)      | 3.02(10)     |
| $C_{dl2,T}$ | 0.0753(2)    | 0.0491(1)    | 0.0399(3)    | 0.0581(1)    | 0.0492(13)   | 0.0412(6)    |
| $C_{dl2,P}$ | 0.840(4)     | 0.779(3)     | 0.472(17)    | 0.755(6)     | 0.462(47)    | 0.523(8)     |
| $R_{ct}$    | 1705(155)    | 1213(46)     | 170(39)      | 566(24)      | 219(181)     | 34(2)        |
| $W_R$       | 103(1)       | 61(1)        | 25(5)        | 53(1)        | 24(16)       | 9.5(6.5)     |
| $W_T$       | 4.94(12)     | 3.37(9)      | 5.52(87)     | 3.81(17)     | 12.2(41)     | 4.43(455)    |
| $W_P$       | 0.421(1)     | 0.416(1)     | 0.370(9)     | 0.400(1)     | 0.386(38)    | 0.337(3)     |

**Table S1:** Results of fit of AC impedance data to equivalent circuit model.

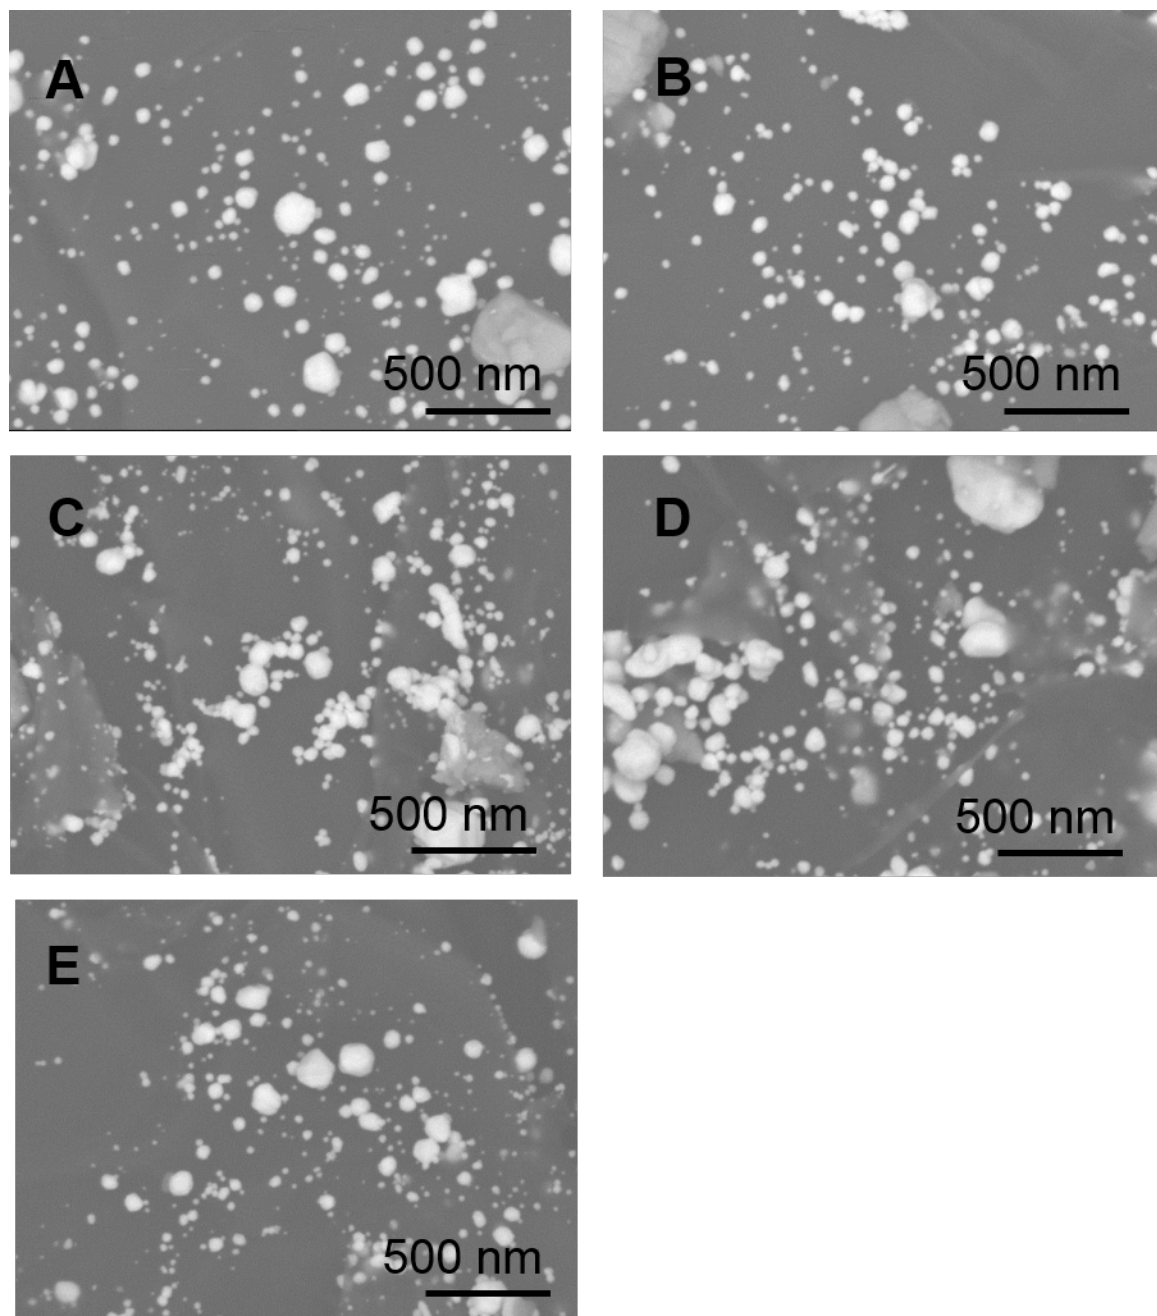

**Figure S1.** Backscattered electron (BSE) SEM images taken at 50,000X magnification of reground  $\text{Ag}_2\text{VP}_2\text{O}_8$ -graphite pellets discharged to 0.1e (A,B), 0.5e (C,D), and 1e (E) using the discharge rate C/168 (A,C,E) or C/1440 (B,D).

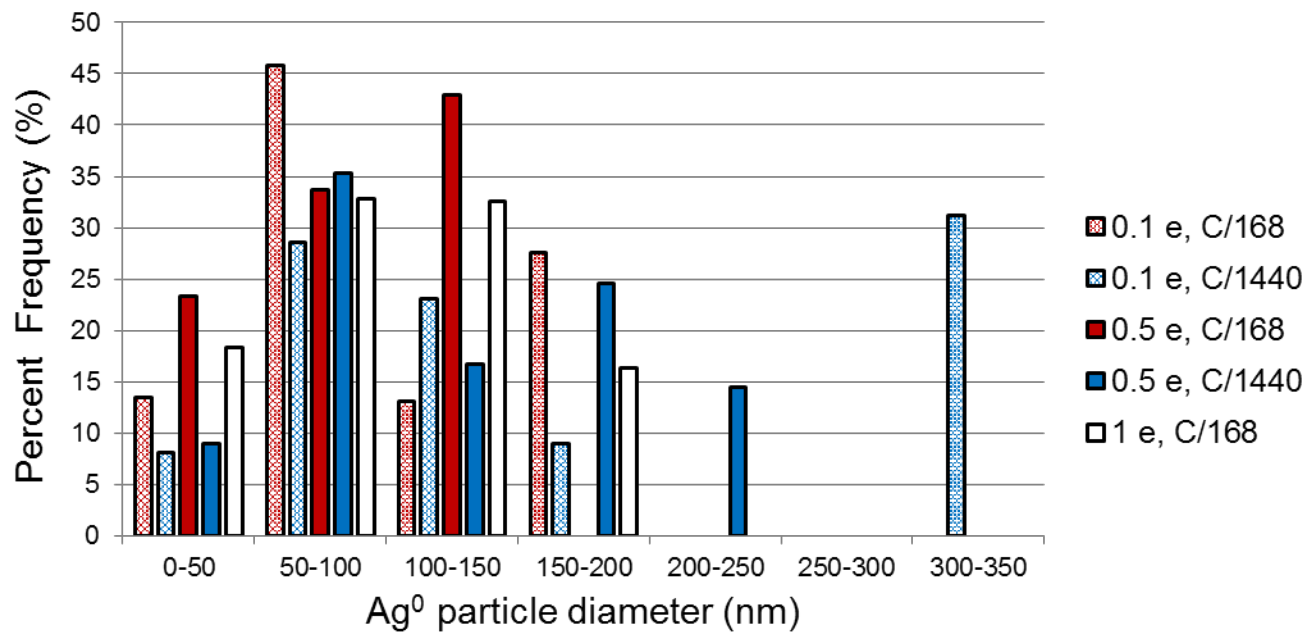

**Figure S2.** Volume weighted frequency distributions of Ag<sup>0</sup> particles in reground Ag<sub>2</sub>VP<sub>2</sub>O<sub>8</sub> - graphite pellets.
